# Supplementary material for: Synthesis and characterization of extremely small gold nanoshells, and comparison of their photothermal conversion capacity with gold nanorods
Source: Royal Society of Chemistry journal article supplement (doi:10.1039/c6nr00027d), 2016-01-01

## Electronic Supplementary Information

### Synthesis and Characterization of Extremely Small Gold Nanoshells, and Comparison of Their Photothermal Conversion Capacity with Gold Nanorods

Ana L. Durán-Meza, David S. Moreno-Gutiérrez, Jaime F. Ruiz-Robles, Alan Bañuelos-Frías, Xóchitl F. Segovia-González, Adriana M. Longoria-Hernández, Eduardo Gómez, Jaime Ruiz-García

ESI-1. a). UV-Vis-NIR absorption spectra of AuNRs of  $4.1 \pm 0.6$  aspect ratio and b). Transmission electron microscopy (scale bar correspond to 20 nm).

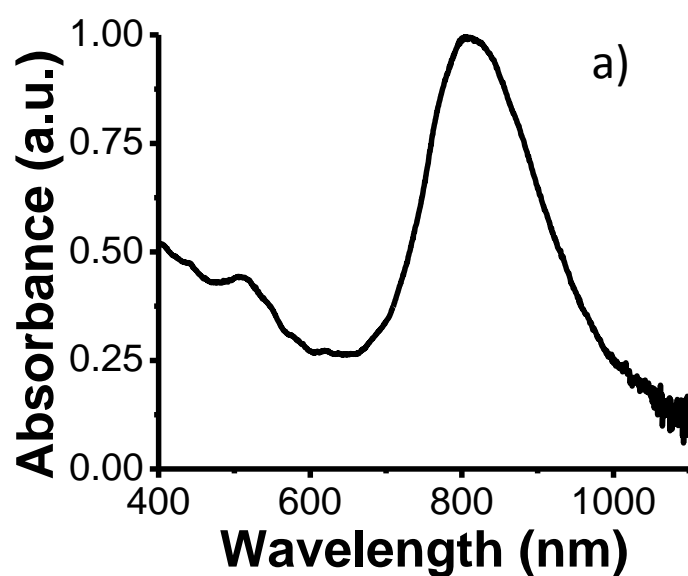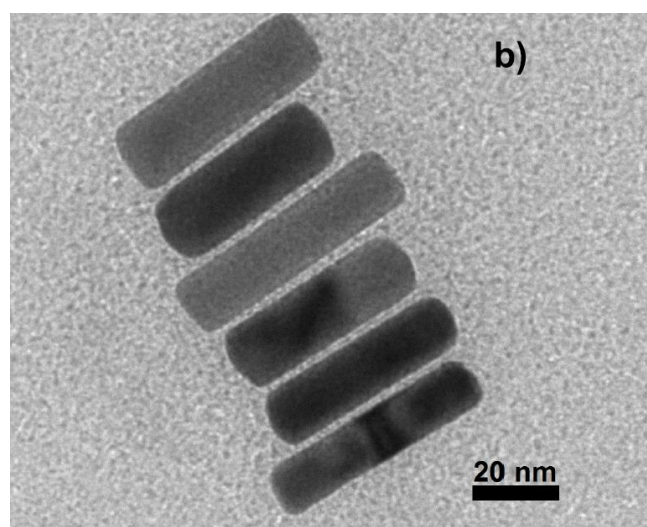

Supplement: c6nr00027d1.pdf [file c6nr00027d1.pdf]
